# Supplementary material for: Vine-Winery Byproducts as Precious Resource of Natural Antimicrobials: In Vitro Antibacterial and Antibiofilm Activity of Grape Pomace Extracts against Foodborne Pathogens
Source: MDPI journal article supplement (doi:10.3390/microorganisms12030437), 2024-02-21
Supplement: s1 [file s1]

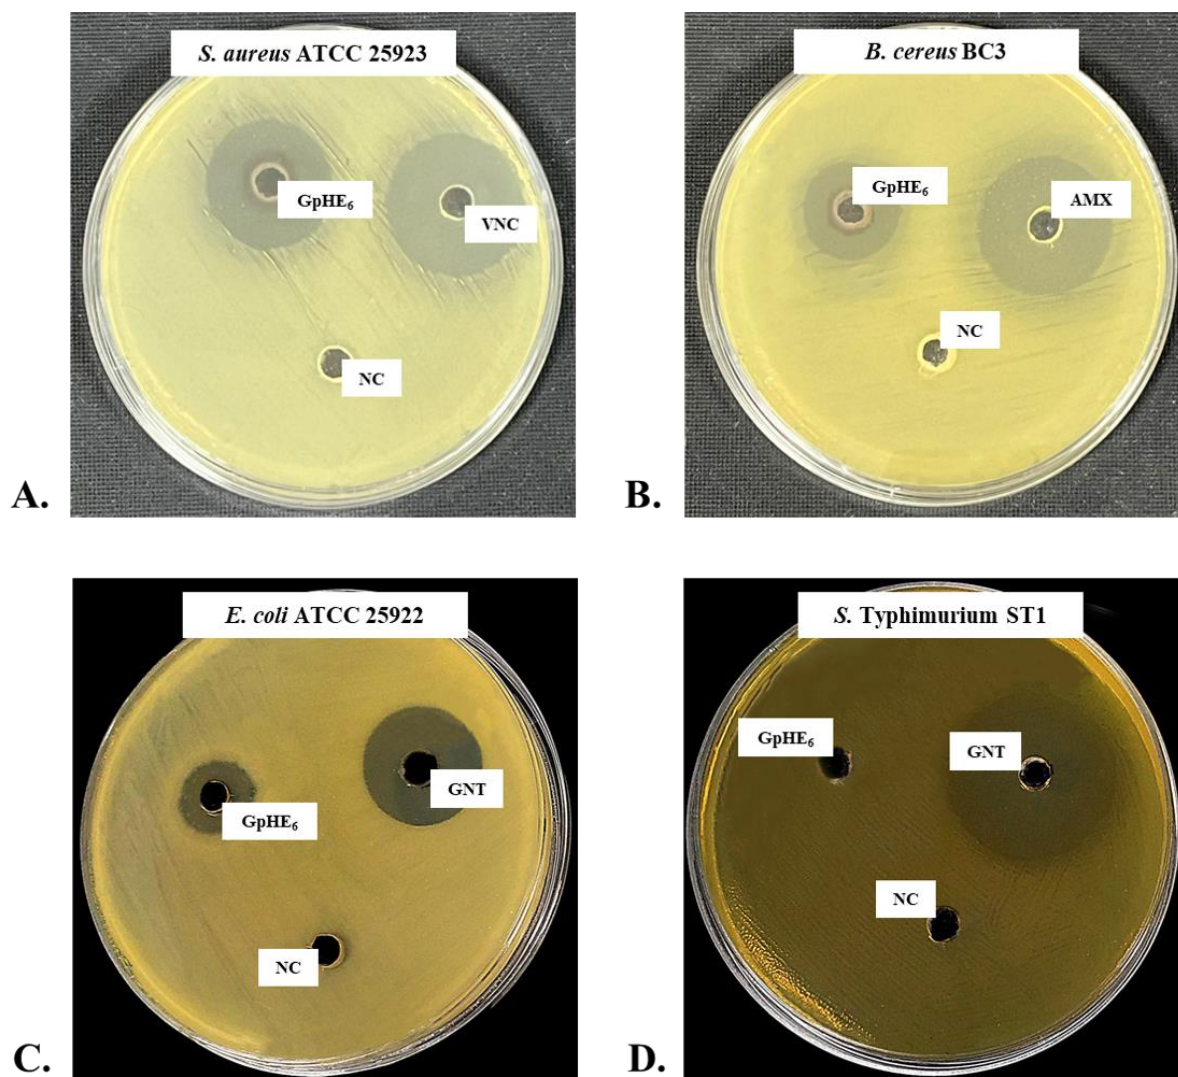

**Figure S1.** Images of *in vitro* antibacterial activity of hydro-ethanolic grape pomace extract against *Staphylococcus aureus* ATCC 25923 (A), *Bacillus cereus* BC3 (B), *Escherichia coli* ATCC 25922 (C) *Salmonella enterica* subsp. *enterica* serovar Typhimurium ST1 (D) foodborne bacteria. GpHE<sub>6</sub>, grape pomace hydro-ethanolic extract n°6 (20 mg/well); VNC, vancomycin (0.5 mg/well); AMX, amoxicillin (5 mg/well); GNT, gentamicin (6 mg/well); NC, negative control (hydroalcoholic extraction buffer, composed of ethanol and distilled water at 50% v/v).

**Table S1.** Total polyphenols content of aqueous and hydro-ethanolic extracts of Aglianico (*V. vinifera* L.) grape pomace obtained by ultrasonic-assisted extraction.

| N° | Extract           | TPC (mg GAE g <sup>-1</sup> ) |
|----|-------------------|-------------------------------|
| 1  | GpAE <sub>1</sub> | 7.9 ± 0.0 <sup>a</sup>        |
| 2  | GpAE <sub>2</sub> | 12.2 ± 0.2 <sup>b</sup>       |
| 3  | GpAE <sub>3</sub> | 9.3 ± 0.2 <sup>a</sup>        |
| 4  | GpAE <sub>4</sub> | 15.7 ± 0.0 <sup>b</sup>       |
| 5  | GpAE <sub>5</sub> | 8.7 ± 0.1 <sup>a</sup>        |
| 6  | GpAE <sub>6</sub> | 16.5 ± 0.2 <sup>b</sup>       |
| 7  | GpAE <sub>7</sub> | 12.3 ± 0.0 <sup>a</sup>       |
| 8  | GpAE <sub>8</sub> | 28.5 ± 1.1 <sup>c</sup>       |
| 9  | GpHE <sub>1</sub> | 24.4 ± 0.2 <sup>c</sup>       |
| 10 | GpHE <sub>2</sub> | 51.9 ± 2.9 <sup>d</sup>       |
| 11 | GpHE <sub>3</sub> | 26.5 ± 0.5 <sup>c</sup>       |
| 12 | GpHE <sub>4</sub> | 58.2 ± 2.7 <sup>e</sup>       |
| 13 | GpHE <sub>5</sub> | 26.6 ± 0.0 <sup>c</sup>       |
| 14 | GpHE <sub>6</sub> | 57.1 ± 2.1 <sup>e</sup>       |
| 15 | GpHE <sub>7</sub> | 26.9 ± 0.4 <sup>c</sup>       |
| 16 | GpHE <sub>8</sub> | 50.4 ± 3.7 <sup>d</sup>       |

<sup>1</sup> TPC, total polyphenols content; GAE, gallic acid equivalents; GpAE, grape pomace aqueous extract; GpHE, grape pomace hydro-ethanolic extract.

<sup>2</sup> The results estimated by Folin-Ciocalteu assay are expressed in mg gallic acid (GAE) equivalents per g of dry solid matrix. Results were reported as mean values ± standard deviation.

<sup>3</sup> One-way ANOVA test was performed to evaluate statistical significance. Tukey's post hoc test ( $p < 0.05$ ) allowed to examine the statistical significance for multiple comparisons. Different letters (a-e) indicate significant differences extracts; extracts with no significant differences receive the same letter.

**Table S2.** *In vitro* antibacterial activity of hydro-ethanolic grape pomace extract against *Staphylococcus aureus* ATCC 25923, *Bacillus cereus* BC3, *Escherichia coli* ATCC 25922 and *Salmonella enterica* subsp. *enterica* serovar Typhimurium ST1 foodborne bacteria.

| Antibacterial agents                           | MDIZ (mm)                 |                              |                              |                              |
|------------------------------------------------|---------------------------|------------------------------|------------------------------|------------------------------|
|                                                | <i>S. aureus</i>          | <i>B. cereus</i>             | <i>E. coli</i>               | <i>S. Typhimurium</i>        |
|                                                | ATCC 25923                | BC3                          | ATCC 25922                   | ST1                          |
| <b>GpHE<sub>6</sub></b><br><b>(5 mg/well)</b>  | 16.7 ± 1.7 <sup>b *</sup> | 8.7 ± 0.5 <sup>b ****</sup>  | 00.0 ± 0.0 <sup>b ****</sup> | 00.0 ± 0.0 <sup>b ****</sup> |
| <b>GpHE<sub>6</sub></b><br><b>(10 mg/well)</b> | 19.2 ± 0.9 <sup>a</sup>   | 9.3 ± 0.2 <sup>b ****</sup>  | 7.2 ± 0.2 <sup>c ****</sup>  | 00.0 ± 0.0 <sup>b ****</sup> |
| <b>GpHE<sub>6</sub></b><br><b>(20 mg/well)</b> | 21.2 ± 0.9 <sup>a</sup>   | 14.0 ± 0.8 <sup>c ****</sup> | 7.6 ± 0.4 <sup>c ****</sup>  | 00.0 ± 0.0 <sup>b ****</sup> |
| <b>VNC</b><br><b>(0.5 mg/well)</b>             | 21.7 ± 2.9 <sup>a</sup>   | -                            | -                            | -                            |
| <b>AMX</b><br><b>(5 mg/well)</b>               | -                         | 32.7 ± 2.1 <sup>a</sup>      | -                            | -                            |
| <b>GNT</b><br><b>(6 mg/well)</b>               | -                         | -                            | 29.0 ± 0.8 <sup>a</sup>      | 18.5 ± 0.4 <sup>a</sup>      |

<sup>1</sup> MDIZ, mean diameter of the inhibition zone; GpHE<sub>6</sub>, grape pomace hydro-ethanolic extract n°6; VNC, vancomycin; AMX, amoxicillin; GNT, gentamicin.

<sup>2</sup> Results were obtained by agar well diffusion method; triplicate assays with independent cultures. The mean diameters of inhibition zone are reported as mean values ± standard deviation (expressed in mm)

<sup>3</sup> One-way ANOVA test was performed to evaluate statistical significance. Comparison with positive control was analyzed by Dunnett's post hoc test ( $p < 0.05$ ), using asterisks to indicate statistical significance respect to the positive control (\*\*\*\*  $p < 0.0001$ ; \*  $p < 0.05$ ). Tukey's post hoc test ( $p < 0.05$ ) allowed to examine the statistical significance for multiple comparisons between several tested volumes of extract GpHE<sub>6</sub> for each microorganism. Different letters (a, b) indicate significant differences between compared values; values with no significant differences receive the same letter.
